# Supplementary material for: A Computational Method of Defining Potential Biomarkers based on Differential Sub-Networks
Source: PubMed Central journal article supplement (PMC5662748; doi:10.1038/s41598-017-14682-5), 2017-10-30
Supplement: 41598_2017_14682_MOESM1_ESM.pdf [file 41598_2017_14682_MOESM1_ESM.pdf]

## **A Computational Method of Defining Potential Biomarkers based on Differential Sub-Networks**

Xin Huang<sup>a</sup>, Xiaohui Lin<sup>a\*</sup>, Jun Zeng<sup>b</sup>, Lichao Wang<sup>b</sup>, Peiyuan Yin<sup>b</sup>,  
Lina Zhou<sup>b</sup>, Chunxiu Hu<sup>b</sup>, Weihong Yao<sup>a</sup>

<sup>a</sup> School of Computer Science & Technology, Dalian University of  
Technology, 116024 Dalian, China.

<sup>b</sup> CAS Key Laboratory of Separation Science for Analytical Chemistry,  
Dalian Institute of Chemical Physics, Chinese Academy of Sciences,  
Dalian 116023, China.

\* Corresponding person:

Prof. Xiaohui Lin, School of Computer Science & Technology, Dalian  
University of Technology, 116024 Dalian, China.

E-mail: [datas@dlut.edu.cn](mailto:datas@dlut.edu.cn).

## **The descriptions of the datasets and the definitions of training and test set**

For the gene expression data, the 63 training samples included both tumor biopsy material (13 EWS and 10 RMS) and cell lines (10 EWS, 10 RMS, 12 NB and 8 Burkitt lymphomas (BL; a subset of NHL)). The test samples contained both tumors (5 EWS, 5 RMS and 4 NB) and cell lines (1 EWS, 2NB and 3 BL). Filtering for a minimal level of expression reduced the number of genes to 2308 [1].

For the metabolomics training data [2], week 0 was defined as the starting time point of the experiment. The collection of time-serial sera set was conducted from week 8 to week 20 once every 2 weeks. The serial progression of hepato-carcinogenesis in the model group was divided into three stages: week 8 (hepatitis (H) stage,  $S_1$ ), week 10-14 (CIR stage,  $S_2$ - $S_4$ ) and week 16-20 (HCC stage,  $S_5$ - $S_7$ ) according to histological examination.  $S_1$ ,  $S_4$ , and  $S_7$  were the typical time points of the corresponding liver disease stages, whereas  $S_2$  and  $S_5$  were the first time points of the corresponding liver disease stages. The time-serial sera training set, including 7 rats from model group and 10 rats from control group. In the test set, there were 36 sera from another 6 model rats. These 6 rats were sacrificed for histological examination with the affirmance of HCC at week 18. Therefore, their sera were collected from 6 monitoring time points (i.e.,  $S_1$ - $S_6$ ). Histological examinations to validate HCC reveal that  $S_1$ - $S_4$  were the pre-cancer stage, whereas  $S_5$ - $S_6$  were the HCC stage.

In many areas of information science, finding classifying or predictive relationships from data is a very important task. Initial discovery of relationships is usually done with a training set while a test set is used for evaluating whether the discovered relationships hold. More formally, a training set is a set of data used to discover potentially classifying or predictive relationships. A test set is a set of data used to assess the strength and utility of a classifying or predictive relationship.

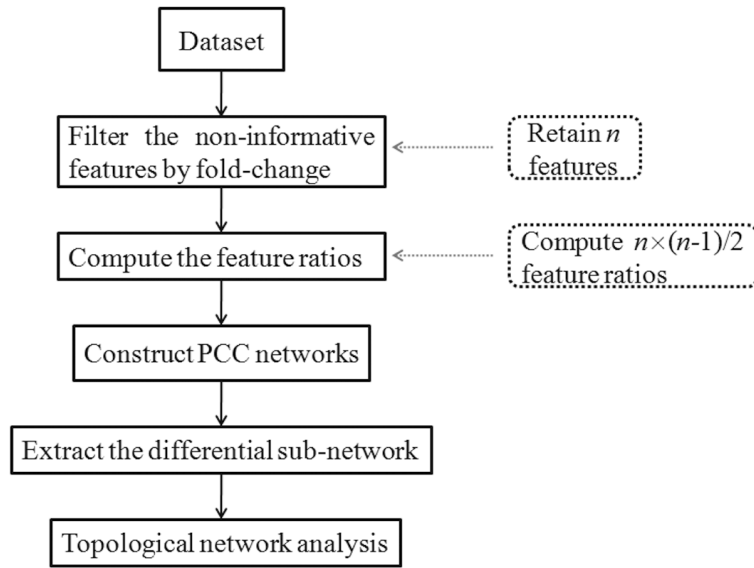

**Fig. S1** The workflow of PB-DSN

**Table S1** The top five ratios based on the degrees in  $SG_{EWS}$

| Node    | Numerator  | Denominator | Degree |
|---------|------------|-------------|--------|
| Ratio 1 | $f_{509}$  | $f_{2199}$  | 370    |
| Ratio 2 | $f_{187}$  | $f_{417}$   | 367    |
| Ratio 3 | $f_{1803}$ | $f_{2050}$  | 365    |
| Ratio 4 | $f_{1975}$ | $f_{1980}$  | 365    |
| Ratio 5 | $f_{831}$  | $f_{2235}$  | 363    |

**Table S2** The top five ratios based on the degrees in  $SG_5$

| Numerator             | Denominator             | Degree |
|-----------------------|-------------------------|--------|
| N,N-dimethylglycine   | Threonic acid           | 36     |
| N,N-dimethylglycine   | Mucic acid              | 33     |
| 3-Hydroxybutyric acid | Ethanolamine phosphate  | 33     |
| Betaine               | Mucic acid              | 32     |
| Mucic acid            | Imidazole-4-acetic acid | 32     |

**Table S3 The significance test of the 5 identified metabolite ratios between control and age-matched model groups**

| Metabolite 1<br>(Numerator) | Metabolite 2<br>(Denominator) | <i>p</i> -value |             |             |             |             |             |             |
|-----------------------------|-------------------------------|-----------------|-------------|-------------|-------------|-------------|-------------|-------------|
|                             |                               | C8 vs. M8       | C10 vs. M10 | C12 vs. M12 | C14 vs. M14 | C16 vs. M16 | C18 vs. M18 | C20 vs. M20 |
| N,N-dimethylglycine         | Threonic acid                 | 8.57E-10        | 8.30E-05    | 7.33E-05    | 4.27E-05    | 1.98E-03    | 4.36E-04    | 6.67E-04    |
| N,N-dimethylglycine         | Mucic acid                    | 6.74E-06        | 2.63E-04    | 3.70E-04    | 6.62E-04    | 1.53E-03    | 3.25E-03    | 7.83E-03    |
| 3-Hydroxybutyric acid       | Ethanolamine phosphate        | 1.02E-05        | 9.34E-04    | 2.09E-01    | 1.29E-01    | 5.53E-01    | 5.45E-01    | 7.23E-01    |
| Betaine                     | Mucic acid                    | 2.28E-07        | 1.36E-04    | 2.89E-04    | 1.37E-03    | 2.34E-03    | 8.09E-04    | 2.68E-03    |
| Mucic acid                  | Imidazole-4-acetic acid       | 6.37E-03        | 1.78E-01    | 2.37E-03    | 2.53E-02    | 1.89E-02    | 1.54E-03    | 1.54E-02    |

**Table S4 The significance test of N,N-dimethylglycine/threonic acid between two time points in different stages of liver disease**

| Time point | <i>p-value</i> |          |          |          |          |          |
|------------|----------------|----------|----------|----------|----------|----------|
|            | M10            | M12      | M14      | M16      | M18      | M20      |
| M8         | 1.37E-05       | 5.96E-04 | 3.10E-03 | 3.65E-05 | 8.12E-06 | 2.83E-05 |
| M10        | NA             | NA       | NA       | 5.83E-03 | 1.27E-03 | 1.79E-03 |
| M12        | NA             | NA       | NA       | 1.03E-02 | 2.63E-03 | 2.29E-02 |
| M14        | NA             | NA       | NA       | 3.52E-03 | 1.78E-03 | 3.93E-03 |

**Table S5 The significance test of N,N-dimethylglycine/mucic acid between two time points in different stages of liver disease**

| Time point | <i>p-value</i> |          |          |          |          |          |
|------------|----------------|----------|----------|----------|----------|----------|
|            | M10            | M12      | M14      | M16      | M18      | M20      |
| M8         | 3.72E-03       | 5.08E-02 | 1.34E-01 | 2.02E-03 | 1.18E-03 | 1.27E-03 |
| M10        | NA             | NA       | NA       | 7.94E-03 | 3.69E-03 | 6.23E-03 |
| M12        | NA             | NA       | NA       | 1.57E-02 | 7.65E-03 | 3.32E-02 |
| M14        | NA             | NA       | NA       | 1.49E-02 | 8.47E-03 | 2.68E-02 |

**Table S6 The significance test of betaine/mucic acid between two time points in different stages of liver disease**

| Time point | <i>p-value</i> |          |          |          |          |          |
|------------|----------------|----------|----------|----------|----------|----------|
|            | M10            | M12      | M14      | M16      | M18      | M20      |
| M8         | 6.46E-02       | 5.50E-01 | 7.75E-03 | 5.87E-04 | 2.05E-04 | 2.48E-04 |
| M10        | NA             | NA       | NA       | 8.84E-03 | 3.97E-03 | 5.67E-03 |
| M12        | NA             | NA       | NA       | 1.17E-02 | 8.42E-03 | 1.11E-02 |
| M14        | NA             | NA       | NA       | 2.98E-02 | 1.89E-02 | 2.75E-02 |

**Table S7 The comparison between PN-DSN and BioNet for the different thresholds of false discovery rates (FDR) on the static dataset**

| Method | Parameter setting | EWS vs. non-EWS |              | BL vs. non-BL |              | RMS vs. non-RMS |              | NB vs. non-NB |              |
|--------|-------------------|-----------------|--------------|---------------|--------------|-----------------|--------------|---------------|--------------|
|        |                   | Training set    | Test set     | Training set  | Test set     | Training set    | Test set     | Training set  | Test set     |
| PB-DSN |                   | 1.000           | 1.000        | 1.000         | 1.000        | 0.965           | 1.000        | 1.000         | 1.000        |
| BioNet | E-07              | 0.987           | 0.917        | 1.000         | 1.000        | 0.980           | 1.000        | 1.000         | 1.000        |
|        | 5E-07             | 0.987           | 0.917        | 1.000         | 1.000        | 1.000           | 1.000        | 1.000         | 1.000        |
|        | <b>E-06</b>       | <b>0.987</b>    | <b>0.917</b> | <b>1.000</b>  | <b>1.000</b> | <b>1.000</b>    | <b>1.000</b> | <b>1.000</b>  | <b>1.000</b> |

**Bold:** The parameter setting used in the manuscript.

**Table S8 The comparison between PN-DSN and SVM-RFE with different kernel functions and different values of *penalty factor* on the static dataset**

| Method  | Parameter setting | EWS vs. non-EWS |              | BL vs. non-BL |              | RMS vs. non-RMS |              | NB vs. non-NB |              |
|---------|-------------------|-----------------|--------------|---------------|--------------|-----------------|--------------|---------------|--------------|
|         |                   | Training set    | Test set     | Training set  | Test set     | Training set    | Test set     | Training set  | Test set     |
| PB-DSN  |                   | 1.000           | 1.000        | 1.000         | 1.000        | 0.965           | 1.000        | 1.000         | 1.000        |
| SVM-RFE | <b>Linear, 1</b>  | <b>0.789</b>    | <b>0.595</b> | <b>0.889</b>  | <b>1.000</b> | <b>1.000</b>    | <b>1.000</b> | <b>0.750</b>  | <b>0.595</b> |
|         | Linear, 10        | 0.789           | 0.595        | 0.889         | 1.000        | 1.000           | 1.000        | 0.750         | 0.595        |
|         | RBF, 1            | 0.789           | 0.595        | 0.889         | 1.000        | 1.000           | 1.000        | 0.750         | 0.595        |
|         | RBF, 10           | 0.789           | 0.595        | 0.889         | 1.000        | 1.000           | 1.000        | 0.750         | 0.595        |

**Bold:** The parameter setting used in the manuscript. Linear: linear kernel function. RBF: radial base kernel function.

**Table S9 The comparison between PN-DSN and MEBA for different top *k* features on the time-series dataset**

| Method | <i>k</i>     | N vs. M      |              | HCC vs. non-HCC |              | H vs. CIR    |              |
|--------|--------------|--------------|--------------|-----------------|--------------|--------------|--------------|
|        |              | Training set | Test set     | Training set    | Test set     | Training set | Test set     |
| PB-DSN |              | 0.898        | 0.948        | 0.954           | 0.948        | 0.966        | 0.972        |
| MEBA   | top 1        | 0.826        | 0.917        | 0.934           | 0.917        | 0.912        | 0.787        |
|        | top 2        | 0.901        | 0.913        | 0.952           | 0.913        | 0.898        | 0.843        |
|        | <b>top 3</b> | <b>0.987</b> | <b>0.903</b> | <b>0.956</b>    | <b>0.903</b> | <b>1.000</b> | <b>0.917</b> |

**Bold:** The parameter setting used in the manuscript.

**Table S10 The comparison between PN-DSN and ATSD-DN with different thresholds of non-overlapping ratios (NOR) on the time-series dataset**

| Method  | Parameter setting | N vs. M      |              | HCC vs. non-HCC |              | H vs. CIR    |              |
|---------|-------------------|--------------|--------------|-----------------|--------------|--------------|--------------|
|         |                   | Training set | Test set     | Training set    | Test set     | Training set | Test set     |
| PB-DSN  |                   | 0.898        | 0.948        | 0.954           | 0.948        | 0.966        | 0.972        |
|         | <b>0.7</b>        | <b>0.699</b> | <b>0.965</b> | <b>0.808</b>    | <b>0.965</b> | <b>0.776</b> | <b>0.870</b> |
| ATSD-DN | 0.75              | 0.699        | 0.965        | 0.808           | 0.965        | 0.776        | 0.870        |
|         | 0.8               | 0.699        | 0.965        | 0.808           | 0.965        | 0.776        | 0.870        |

**Bold:** The parameter setting used in the manuscript.

**Table S11 The comparison between PN-DSN and BioNet with different thresholds of false discovery rates (FDR) on the time-series dataset**

| Method | Parameter setting | N vs. M      |              | HCC vs. non-HCC |              | H vs. CIR    |              |
|--------|-------------------|--------------|--------------|-----------------|--------------|--------------|--------------|
|        |                   | Training set | Test set     | Training set    | Test set     | Training set | Test set     |
| PB-DSN |                   | 0.898        | 0.948        | 0.954           | 0.948        | 0.966        | 0.972        |
|        | E-07              | 0.915        | 0.917        | 0.934           | 0.917        | 0.959        | 0.889        |
| BioNet | 5E-07             | 0.915        | 0.917        | 0.934           | 0.917        | 0.959        | 0.889        |
|        | <b>E-06</b>       | <b>0.915</b> | <b>0.917</b> | <b>0.934</b>    | <b>0.917</b> | <b>0.959</b> | <b>0.889</b> |

**Bold:** The parameter setting used in the manuscript.

**Table S12 The comparison between log-fold change of 2 and log-fold change of 3 in PB-DSN on the static dataset**

| Parameter setting            | Number of retained features | EWS vs. non-EWS |              | BL vs. non-BL |              | RMS vs. non-RMS |              | NB vs. non-NB |              |
|------------------------------|-----------------------------|-----------------|--------------|---------------|--------------|-----------------|--------------|---------------|--------------|
|                              |                             | Training set    | Test set     | Training set  | Test set     | Training set    | Test set     | Training set  | Test set     |
| <b> log(fold-change)  =3</b> | <b>81</b>                   | <b>1.000</b>    | <b>1.000</b> | <b>1.000</b>  | <b>1.000</b> | <b>0.965</b>    | <b>1.000</b> | <b>1.000</b>  | <b>1.000</b> |
| log(fold-change)  =2         | 254                         | 0.940           | 0.774        | 1.000         | 1.000        | 0.973           | 1.000        | 0.941         | 1.000        |

**Bold:** The parameter setting used in the manuscript.

**Table S13 The influence of the threshold of *PCC* on the performance of PB-DSN on the static dataset**

| Parameter setting | EWS vs. non-EWS |              | BL vs. non-BL |              | RMS vs. non-RMS |              | NB vs. non-NB |              |
|-------------------|-----------------|--------------|---------------|--------------|-----------------|--------------|---------------|--------------|
|                   | Training set    | Test set     | Training set  | Test set     | Training set    | Test set     | Training set  | Test set     |
| 0.5               | 0.878           | 0.857        | 1.000         | 1.000        | 0.708           | 0.880        | 1.000         | 1.000        |
| 0.6               | 0.996           | 1.000        | 1.000         | 1.000        | 0.921           | 1.000        | 1.000         | 1.000        |
| <b>0.7</b>        | <b>1.000</b>    | <b>1.000</b> | <b>1.000</b>  | <b>1.000</b> | <b>0.965</b>    | <b>1.000</b> | <b>1.000</b>  | <b>1.000</b> |
| 0.8               | 0.975           | 1.000        | 0.895         | 1.000        | 0.934           | 1.000        | 0.845         | 0.786        |
| 0.9               | 0.953           | 1.000        | 0.964         | 1.000        | 0.935           | 1.000        | 0.685         | 0.810        |

**Bold:** The parameter setting used in the manuscript.

**Table S14 The influence of the threshold of *PCC* on the performance of PB-DSN on the time-series dataset**

| Parameter setting | N vs. M      | HCC vs. non-HCC |              | H vs. CIR    |              |
|-------------------|--------------|-----------------|--------------|--------------|--------------|
|                   | Training set | Training set    | Test set     | Training set | Test set     |
| 0.5               | 0.766        | 0.639           | 0.774        | 0.517        | 0.833        |
| 0.6               | 0.924        | 0.923           | 0.903        | 0.748        | 0.824        |
| <b>0.7</b>        | <b>0.898</b> | <b>0.954</b>    | <b>0.948</b> | <b>0.966</b> | <b>0.972</b> |
| 0.8               | 0.913        | 0.685           | 0.656        | 0.639        | 0.611        |
| 0.9               | 0.843        | 0.878           | 0.889        | 0.741        | 0.935        |

**Bold:** The parameter setting used in the manuscript.

## Reference

- [1] Khan, J. *et al.* Classification and diagnostic prediction of cancers using gene expression profiling and artificial neural networks. *Nat. Med.* 7, 673-679 (2001).
- [2] Zeng, J. *et al.* Metabolomics identifies biomarker pattern for early diagnosis of hepatocellular carcinoma: from diethylnitrosamine treated rats to patients. *Sci. Rep.* 5, (2015).
